# Supplementary material for: Quantifying batch effects for individual genes in single-cell data
Source: Research Square preprint supplement (doi:10.21203/rs.3.rs-4867545/v1), 2024-10-17
Supplement: Supplementary file 1 [file 54e067f57f6bf99af2d7e420.xlsx]

## Sheet: Table1
Supplementary Table 1. Details of datasets used in the manuscript.
Dataset	Category	Batch number	Total cell/sample number	HVG number	HTG number	PMID/doi	Publication	Data source
Mouse MOp	scRNA	6	406187	4000	1,600 (cell type, technology, and source)	34616066	A transcriptomic and epigenomic cell atlas of the mouse primary motor cortex	https://cellxgene.cziscience.com/collections/ae1420fe-6630-46ed-8b3d-cc6056a66467
Mouse retina	scRNA	2	71638	2000	600 (cell type), 300 (source)	31948481	A benchmark of batch-effect correction methods for single-cell RNA sequencing data	https://github.com/JinmiaoChenLab/Batch-effect-removal-benchmarking/tree/master/Data
Human cortical development	scRNA	27	153473	3000	1,650 (cell type), 1,200 (source)	36318921	Human prefrontal cortex gene regulatory dynamics from gestation to adulthood at single-cell resolution	Gene Expression Omnibus database accession code: GSE168408
Human cortex	scRNA	78	379330	4000	2,400 (cell type), 1,600 (source)	37824649	Interindividual variation in human cortical cell type abundance and expression	https://cellxgene.cziscience.com/collections/35928d1c-36fc-4f93-9a8d-0b921ab41745
Human MTG	scRNA	5	137303	4000	1,400 (cell type), 800 (source)	10.1101/2022.09.20.508736	Conserved coexpression at single cell resolution across primate brains	https://portal.brain-map.org/atlases-and-data/rnaseq
Human cell lines	scRNA	3	9531	2000	300 (cell type and source)	28091601	Massively parallel digital transcriptional profling of single cells	https://github.com/JinmiaoChenLab/Batch-effect-removal-benchmarking/tree/master/Data
Human PBMCs	scRNA	2	13999	2000	200 (source)	29227470	Multiplexed droplet single-cell RNA-sequencing using natural genetic variation	https://github.com/satijalab/seurat-data
TCGA READ	bulk RNA	2	166	/	9,796 (source)	36109686	Removing unwanted variation from large-scale RNA sequencing data with PRPS	https://zenodo.org/record/6392171
Mouse brain (ATAC, peak)	scATAC	11	84813	/	58,154 (source)	34949812	Benchmarking atlas-level data integration in single-cell genomics	https://figshare.com/articles/dataset/Benchmarking_atlas-level_data_integration_in_single-cell_genomics_-_integration_task_datasets_Immune_and_pancreas_/12420968
Mouse brain (ATAC, gene activity)					58,154 (cell type)
Mouse cell lines	single-cell proteomics	2	327	/	467 (source)	36527135; 35835881	Exploring functional protein covariation across single cells using nPOP; Increasing the throughput of sensitive proteomics by plexDIA	https://scproteomicsdb.com/data_info
Human PBMCs (CITE-seq)	single-cell proteomics	2	8715	/	45 (source)	34083792	Scalable, multimodal profiling of chromatin accessibility, gene expression and protein levels in single cells	Gene Expression Omnibus database accession code: GSE156473
